# Supplementary material
Source: PubMed Central journal article supplement (PMC6883149)
Supplement: NIHMS1530308-supplement-6.pdf [file NIHMS1530308-supplement-6.pdf]

## Supplementary Table S1.

### *Patient characteristics for PDX samples*

| Tumor ID       | Gender | Primary Site               | p16 status | Initial Stage (TNM) | Histology | Grade                     | Tissue Location-Type | Smoker |
|----------------|--------|----------------------------|------------|---------------------|-----------|---------------------------|----------------------|--------|
| HN009, HN009LN | Male   | base of tongue, lymph node | negative   | T1 N2b M0           | HNSCC     | moderately differentiated | Primary, Primary     | yes    |
| HN011P, HN011T | Male   | soft palate, tonsil        | positive   | T2 N2c M0           | HNSCC     | moderately differentiated | Primary, Relapsed    | yes    |
| HN013          | Male   | tonsil                     | positive   | T2 N2b M0           | HNSCC     | poorly differentiated     | Primary              | no     |
| CUHN002*       | Male   | anterior tongue            | negative   | T2 N2b M0           | HNSCC     | well differentiated       | Primary              | yes    |
| CUHN004*       | Male   | floor of mouth             | negative   | T3 N2c M0           | HNSCC     | moderately differentiated | Relapsed             | yes    |
| CUHN013*       | Female | submental mass             | negative   | T3 N2c M1           | HNSCC     | moderately differentiated | Primary              | yes    |
| CUHN014*       | Male   | base of tongue             | positive   | T1 N2b M0           | HNSCC     | poorly differentiated     | Primary              | yes    |

\*Tumor tissues obtained from the University of Colorado-Denver, Anschutz Medical Campus. All other tumor tissues were obtained from the University of New Mexico Health Sciences Center.
