# Supplementary material
Source: PubMed Central journal article supplement (PMC6883149)
Supplement: NIHMS1530308-supplement-7.pdf [file NIHMS1530308-supplement-7.pdf]

## Supplementary Table S2

### *Forward and reverse sequences of siRNA constructs*

| siRNA Construct | Forward/reverse sequences                                            |
|-----------------|----------------------------------------------------------------------|
| 1               | 5'-GUAUCUGCAUUCAAUCAACAUUGCC-3'<br>3'-GUCAUAGACGUAAGUUAGUUGUAACGG-5' |
| 2               | 5'-CUUGGAUCAUGCAAUCAACAAAGGT-3'<br>3'-GGGAACCUAGUACGUUAGUUGUUUCCA-5' |
| 3               | 5'-GAAAUUGUCUUUACUAAACAGAUTT-3'<br>3'-CGCUUUAACAGAAAUGAUUUGUCUAAA-5' |
